# Supplementary material for: Environmentally benign syntheses of hexahydro-cyclopenta(b)furan and 2-oxabicyclo[3.2.1]octane derivatives
Source: Royal Society of Chemistry journal article supplement (doi:10.1039/c4ra14359k), 2015-01-01
Supplement: c4ra14359k1.pdf [file c4ra14359k1.pdf]

## Electronic Supplementary Information (ESI)

### Amberlyst-15<sup>®</sup> catalyst for environmentally Benign syntheses of Hexahydro-cyclopenta(b)furan and of 2-oxabicyclo[3.2.1]octane derivatives

Vijaykumar Gupta, Monica Rane, Shilpi Kabiraj and Sujata. V. Bhat\*

#### Index

| Page No |                        |
|---------|------------------------|
| 2-3     | Experimental procedure |
| 4       | Scheme S1              |
| 4       | Scheme S2              |
| 5       | Table SI               |

| Page No | Com No. | Spectrum            |
|---------|---------|---------------------|
| 6       | 6       | <sup>1</sup> H NMR  |
| 7       | 6       | <sup>13</sup> C NMR |
| 8       | 6       | GC-MS               |
| 9       | 7       | <sup>1</sup> H NMR  |
| 10      | 7       | <sup>13</sup> C NMR |
| 11      | 7       | GC-MS               |
| 12      | 13      | <sup>1</sup> H NMR  |
| 13      | 13      | <sup>13</sup> C NMR |
| 14      | 13      | GC-MS               |
| 15      | 14      | <sup>1</sup> H NMR  |
| 16      | 14      | <sup>13</sup> C NMR |
| 17      | 14      | GC-MS               |
| 18      | 15      | <sup>1</sup> H NMR  |
| 19      | 15      | <sup>13</sup> C NMR |
| 20      | 15      | GC-MS               |
| 21      | 16      | <sup>1</sup> H NMR  |
| 22      | 16      | <sup>13</sup> C NMR |
| 23      | 16      | GC-MS               |
| 24      | 17      | <sup>1</sup> H NMR  |
| 25      | 17      | <sup>13</sup> C NMR |
| 26      | 17      | GC-MS               |
| 27      | 18      | <sup>1</sup> H NMR  |
| 28      | 18      | <sup>13</sup> C NMR |
| 29      | 18      | GC-MS               |

|    |                                            |                     |
|----|--------------------------------------------|---------------------|
| 30 | <b>19</b>                                  | <sup>1</sup> H NMR  |
| 31 | <b>19</b>                                  | <sup>13</sup> C NMR |
| 32 | <b>19</b>                                  | GC-MS               |
| 33 | <b>20</b>                                  | <sup>1</sup> H NMR  |
| 34 | <b>20</b>                                  | <sup>13</sup> C NMR |
| 35 | <b>19 and 21</b><br>Inseparable<br>mixture | <sup>13</sup> C NMR |

## Experimental

### General

Commercial solvents were used with further purification by drying and distillation. The monitoring of reaction and checking of purity of the products were done using pre-coated silica gel plates (Merck) and visualization using anisaldehyde sulfuric acid reagent. FT-IR spectra were recorded on Perkin-Elmer Spectrum One spectrometer. <sup>1</sup>H NMR spectra were recorded on Varian spectrometers at 300, 400 and MHz and <sup>13</sup>C at 75 and 100 MHz. GC-MS analysis was carried on Agilent instrument, where GC-6890 was coupled with mass spectrometer MS-5973 N with quadrapole mass detector, using HP-5 (5% phenyl methyl siloxane) column. The compounds **13-20** showed the required m/z: (M<sup>+</sup>) values.

### Synthesis of 2-(2,2,3-trimethylcyclopent-3-enyl)ethanol derivatives (6-7)

A mixture of (1'S)-campholenic aldehyde **1** (32 mmol), activated vinyl compound namely ethyl acrylate or acrylonitrile (60 mmol) and DABCO (0.5 wt eqv) was stirred at room temperature for 4 d. The reaction mixture was diluted with dichloromethane (20 ml); the organic layer was washed with 2N HCl and water and was dried over anhydrous Na<sub>2</sub>SO<sub>4</sub>. Solvent was evaporated and the residue was purified by silica gel column chromatography, the elution with hexane-ethyl acetate (8:2) provided the corresponding Baylis–Hillman adducts **6-7** (Scheme 1).

### General procedure for the synthesis of (1'S)-campholenic alcohols 8-12

To a stirred solution of freshly prepared Grignard reagent (80 mmol) in toluene (10 mL) cooled at 5°C under nitrogen atmosphere, was added dropwise (1'S)-campholenic aldehyde **1** (10 g, 64 mmol) in toluene (30 mL) in 30 min. Reaction mixture was further stirred at 5°C for 2-4 h. Reaction was monitored by TLC. The reaction was quenched with saturated aqueous NH<sub>4</sub>Cl solution (20 mL). The aqueous layer was extracted with toluene. The combined organic layer was washed with brine and dried over anhydrous Na<sub>2</sub>SO<sub>4</sub>. Solvent was evaporated *in vacuo* and the residue was purified by silica gel column chromatography, the elution with hexane-ethyl acetate (8:2) provided the products **8-12** respectively (Scheme 1).<sup>10</sup>

### General procedure for the synthesis of 2-substituted 6,6,6a-trimethyl-hexahydrocyclopenta(b)furan derivatives 13-19

To a stirred solution of (1'S)-campholenic alcohols **6-12** (0.06 mol) in dry toluene (25 mL) Amberlyst-15<sup>®</sup> (1 g) was added and the reaction mixture was stirred at room temperature for 5-9 h. The reaction was monitored by TLC and was filtered. The filtrate was evaporated *in vacuo* and the residue was purified by silica gel column chromatography, the elution with hexane-ethyl acetate (8:2) provided the compounds **13-19** respectively (Table I).

**Synthesis of 2,6,8,8-tetramethyl-1-oxabicyclo[3.2.1]octane (20).** To a stirred solution of **8** (0.063 mol) in dry toluene (25 mL) Amberlyst-15 (1 g) was added and reaction mixture was then stirred at 80 °C for 5 h. Reaction mixture was filtered and solvent was removed *in vacuo* and the residue was subjected to column chromatography (25 g silica gel; 100-200 mesh), the elution with EtOAc-Hexane (1:9) gave 1,3,8,8-tetramethyl-2-oxabicyclo[3.2.1]octane **20** (Scheme 3).

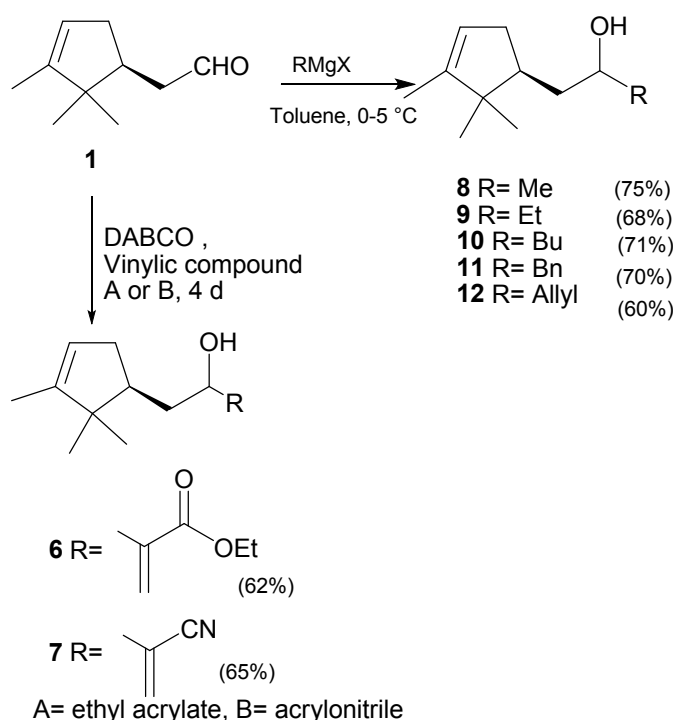

**Scheme 1 Synthesis of (1'S)-campholenic alcohols**

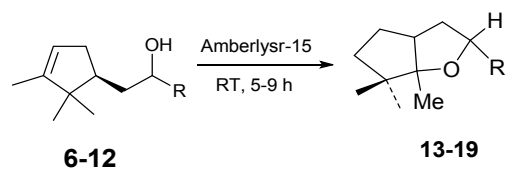

**Scheme 2 Synthesis of 2-substituted 6,6,6a-trimethylhexahydrocyclopenta(b)furan derivatives**

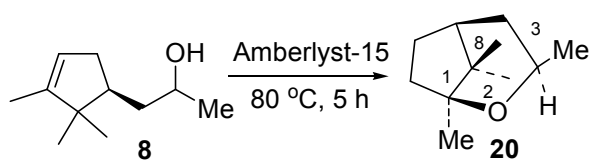

**Scheme 3 Synthesis of 2,6,8,8-tetramethyl-1-oxabicyclo[3.2.1]octane**

**Table 1 Synthesis of 2-substituted 6,6,6a-trimethyl-2-oxabicyclo[3.3.0]octane derivatives.**

**Reaction time and yields**

| Entry | Sub. | Product*                                                                                      | Time h | Yield (%) |
|-------|------|-----------------------------------------------------------------------------------------------|--------|-----------|
| 1     | 6    | 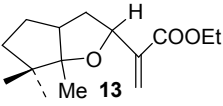 <b>13</b>   | 5      | 77        |
| 2     | 7    |  <b>14</b>   | 5      | 72        |
| 3     | 8    |  <b>15</b>  | 6      | 75        |
| 4     | 9    |  <b>16</b> | 6      | 68        |
| 5     | 10   |  <b>17</b> | 6      | 67        |
| 6     | 11   |  <b>18</b> | 9      | 60        |
| 7     | 12   |  <b>19</b> | 5      | 64        |

\* Minor amount of formation of 3-substituted-1,8,8-trimethyl-2-oxabicyclo[3.2.1]octane (<10%) has been observed

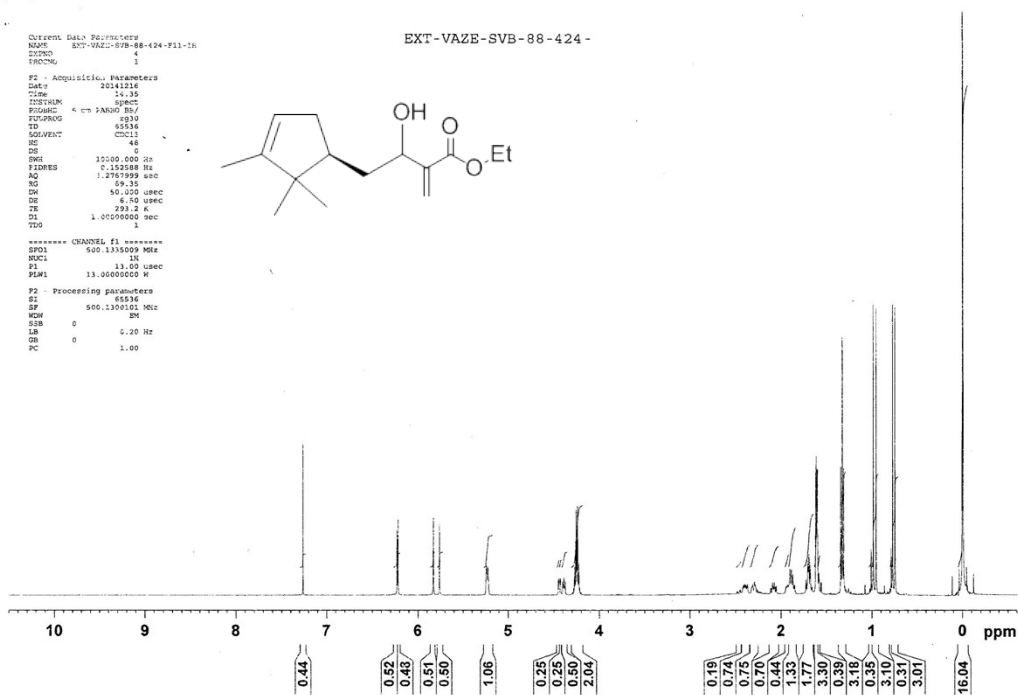

S Fig. 1 <sup>1</sup>H NMR spectrum (500 MHz) of compound 6

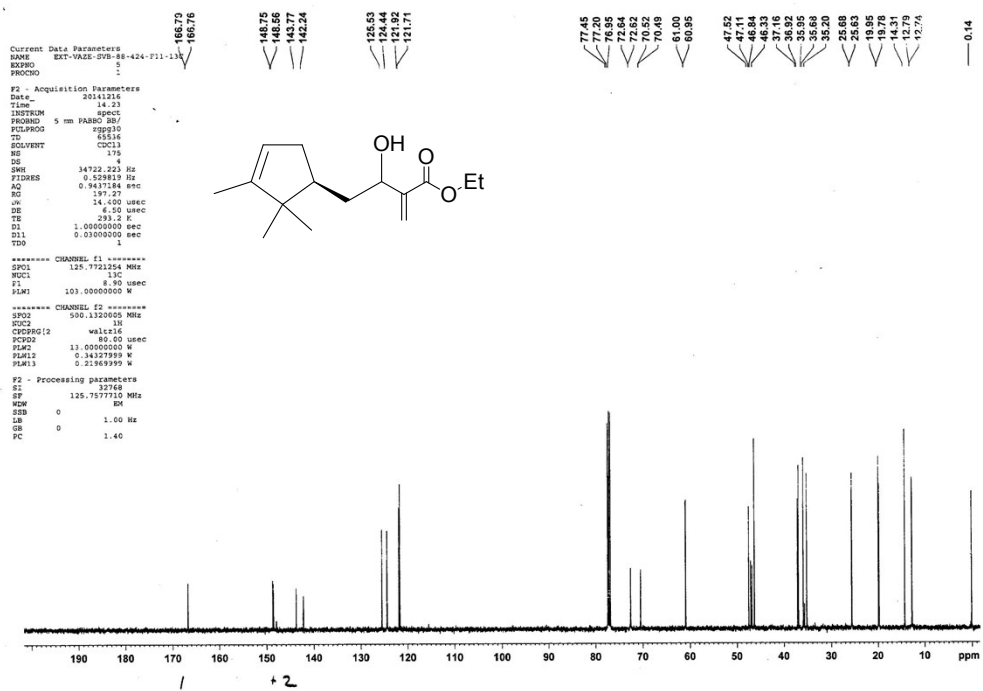

S Fig. 2 <sup>13</sup>C NMR spectrum (125 MHz) of compound 6

File : C:\MSDCHEM\1\DATA\DATA2015\R&D2015\88423F11.D  
Operator :  
Acquired : 12 Jan 2015 20:23 using AcqMethod ALSPERF  
Instrument : 5973N  
Sample Name : 88-423F11.PRDCT MOL WT-252.VIJAY  
Misc Info : R&D.09/01/15  
Vial Number : 4

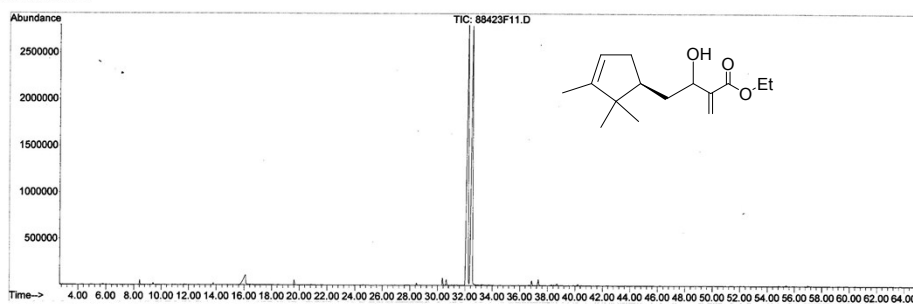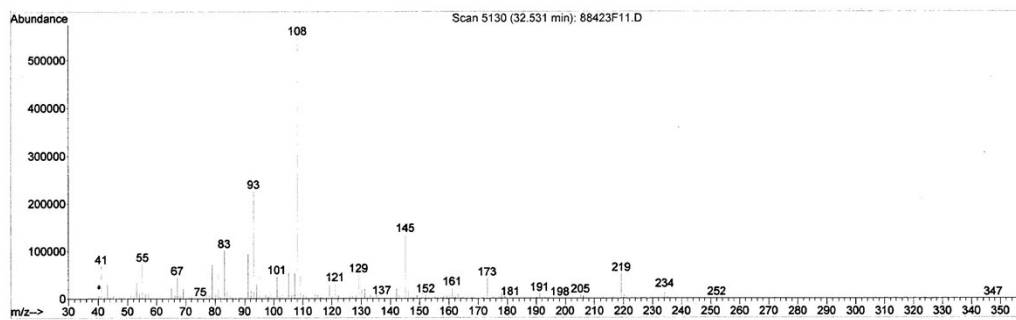

S Fig. 3 GC-MS spectrum of compound 6



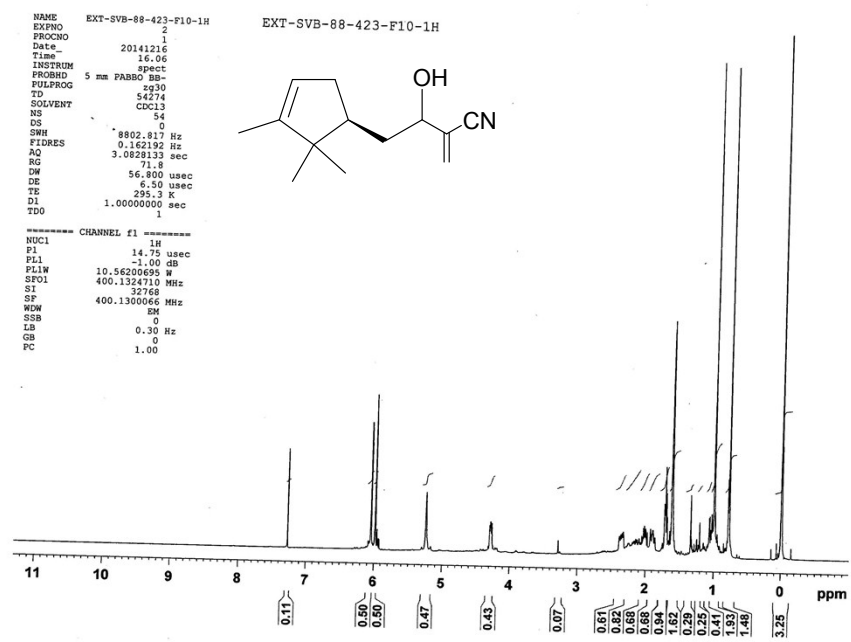

S Fig. 4 <sup>1</sup>H NMR spectrum (500 MHz) of compound 7

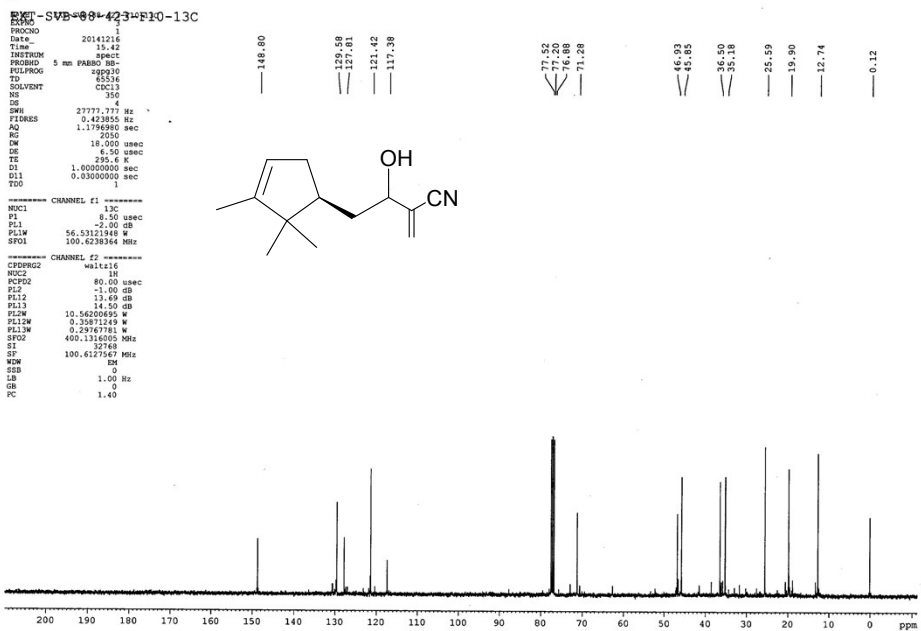

S Fig. 5 <sup>13</sup>C NMR spectrum (125 MHz) of compound 7

File : C:\MSDCHEM\1\DATA\DATA2015\R&D2015\88423F10.D  
Operator :  
Acquired : 12 Jan 2015 19:13 using AcqMethod ALSPERF  
Instrument : 5973N  
Sample Name : 88-423F10.FRDCT MOL WT-205.VIJAY  
Misc Info : R&D.09/01/15  
Vial Number : 3

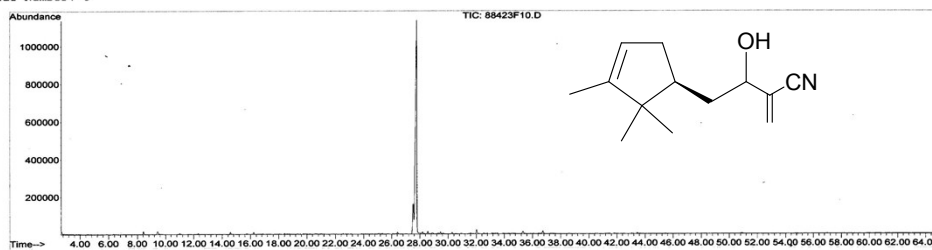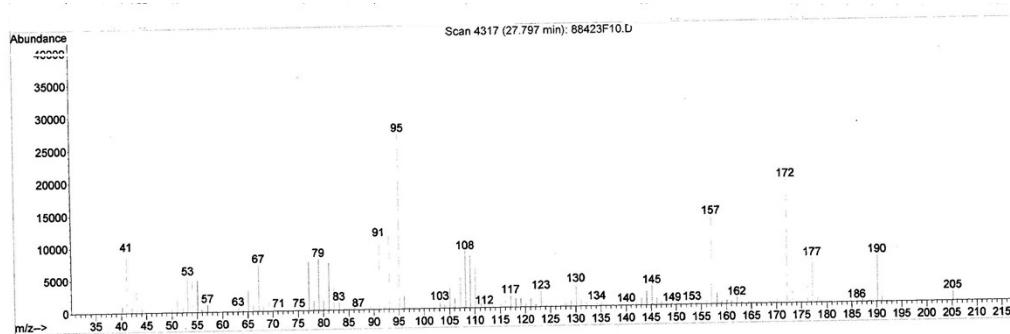

S Fig. 6 GC-MS spectrum of compound 7

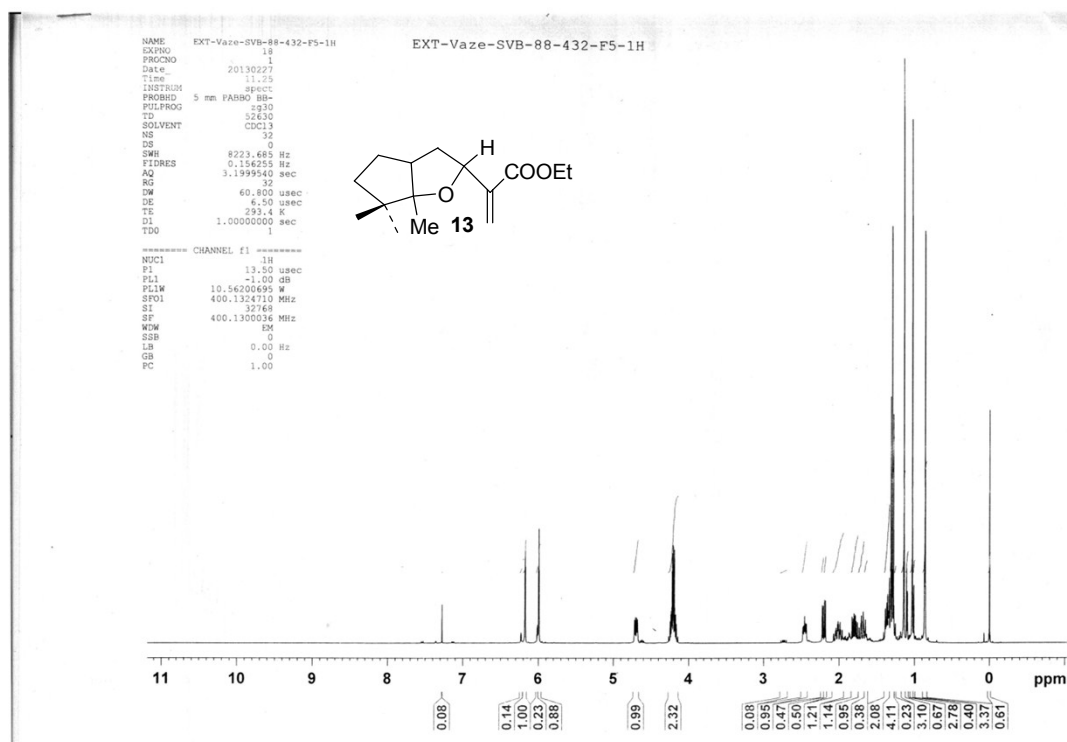

**S Fig. 7**  $^1\text{H}$  NMR spectrum (400 MHz) of compound **13**

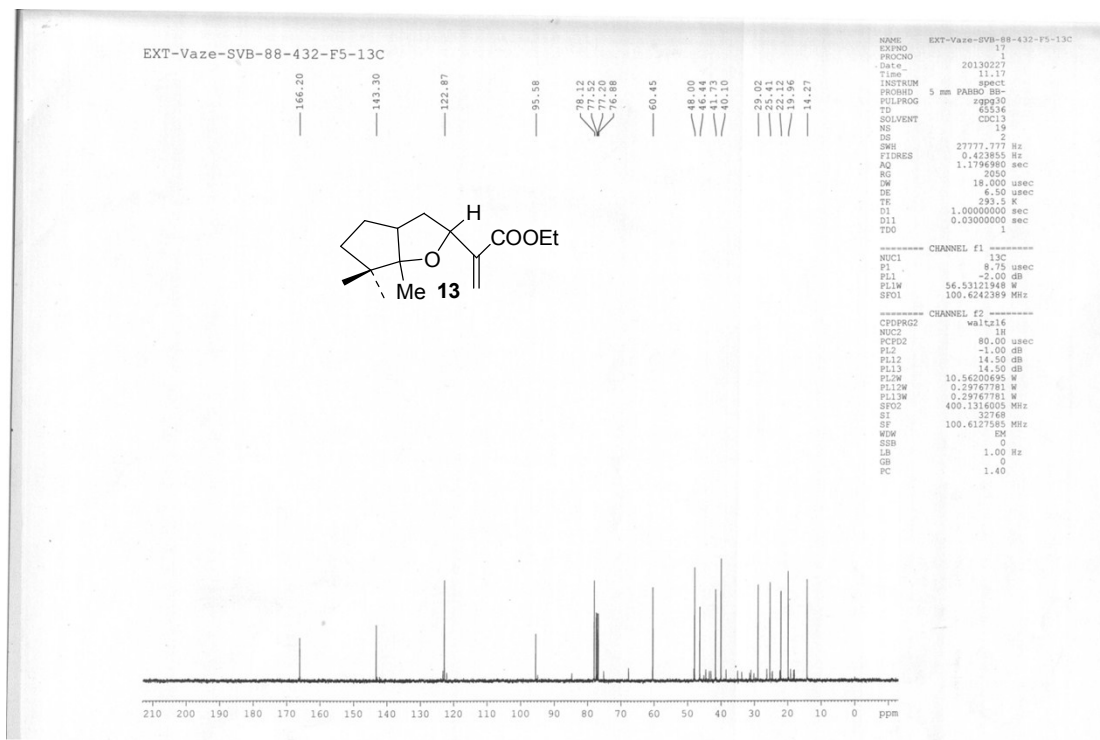

S Fig. 8  $^{13}\text{C}$  NMR spectrum (100 MHz) of compound 13

File : C:\MSDCHEM\1\DATA\DATA2013\R&D2013\88-432F5.D  
Operator :  
Acquired : 5 Feb 2013 00:08 using AcqMethod PERF  
Instrument : MS5973N  
Sample Name : 88-432-F5, PDCT MOL WT-252  
Misc Info : FROM R&D, 4/2/2013  
Vial Number : 80

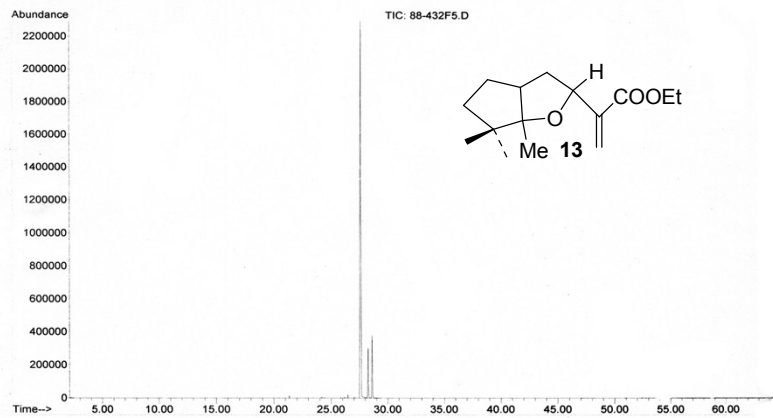

File : C:\MSDCHEM\1\DATA\DATA2013\R&D2013\88-432F5.D  
Operator :  
Acquired : 5 Feb 2013 00:08 using AcqMethod PERF  
Instrument : MS5973N  
Sample Name : 88-432-F5, PDCT MOL WT-252  
Misc Info : FROM R&D, 4-2-2013  
Vial Number : 80

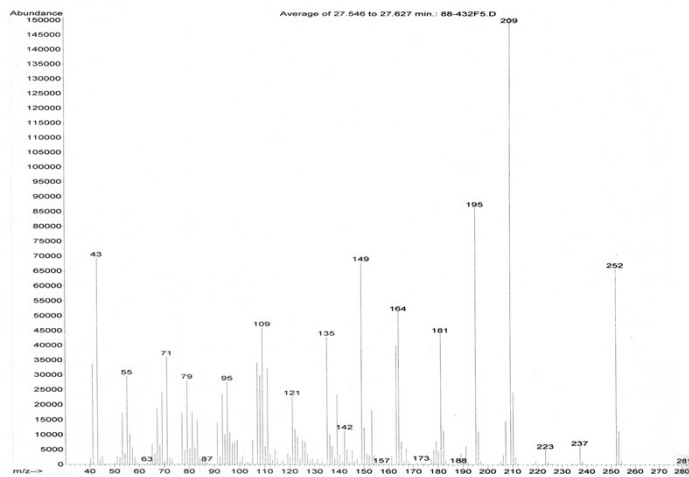

**S Fig. 9** GC-MS spectrum of compound 13

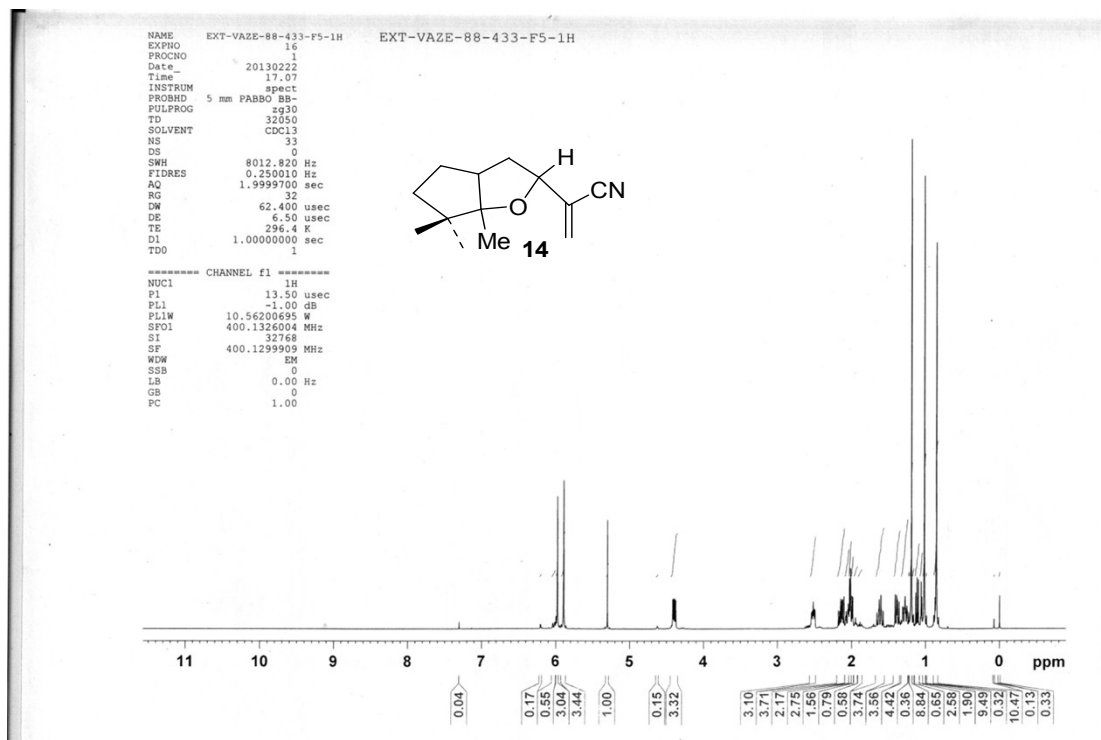

S Fig. 10  $^1\text{H}$  NMR (400 MHz) spectrum of compound 14

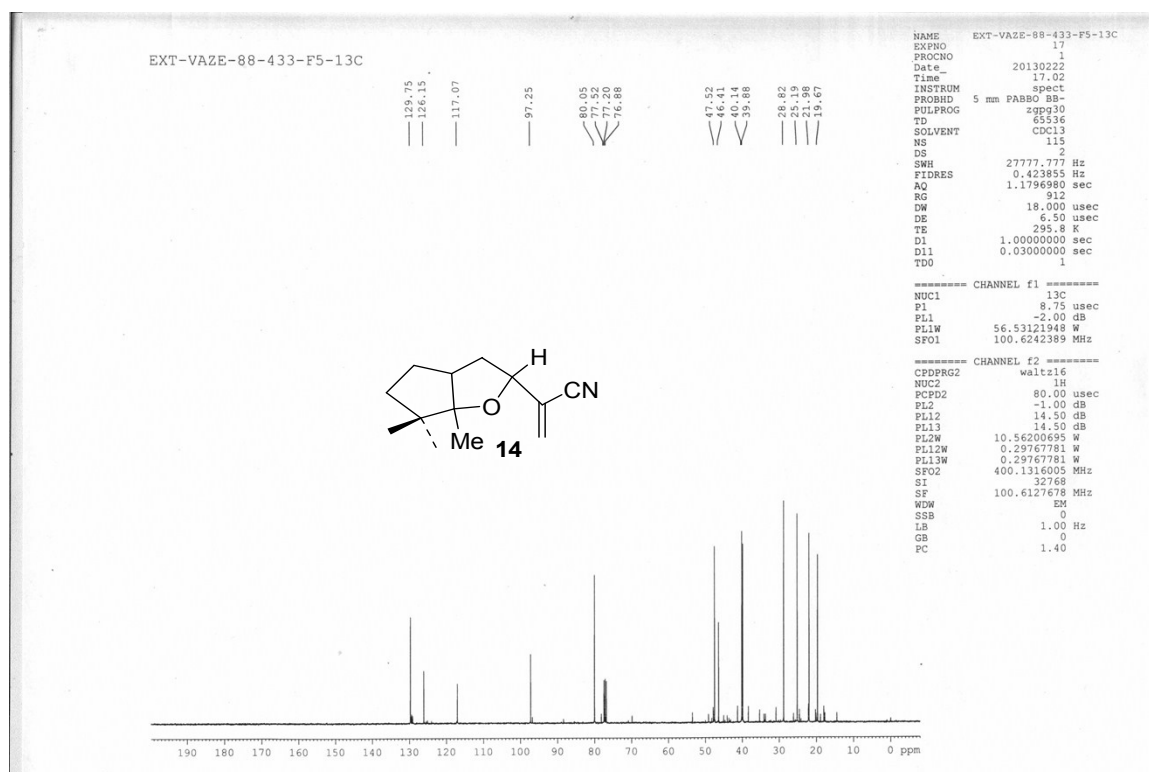

S Fig. 11  $^{13}\text{C}$  NMR spectrum (100 MHz) of compound 14



File : C:\MSDCHEM\1\DATA\DATA2013\R&D2013\88-433F5.D  
Operator :  
Acquired : 5 Feb 2013 1:18 using AcqMethod PERF  
Instrument : MS5973N  
Sample Name : 88-433-F5, PDCT MOL WT-205  
Misc Info : FROM R&D, 4/2/2013  
Vial Number : 81

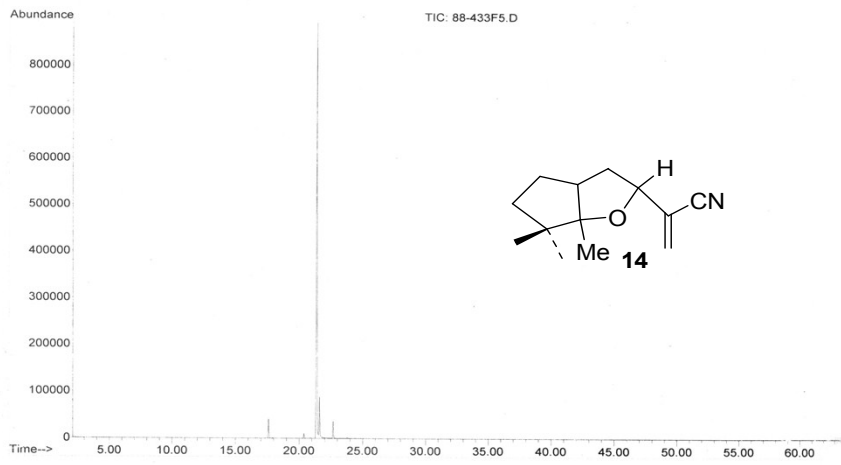

File : C:\MSDCHEM\1\DATA\DATA2013\R&D2013\88-433F5.D  
Operator :  
Acquired : 5 Feb 2013 1:18 using AcqMethod PERF  
Instrument : MS5973N  
Sample Name : 88-433-F5, PDCT MOL WT-205  
Misc Info : FROM R&D, 4/2/2013  
Vial Number : 81

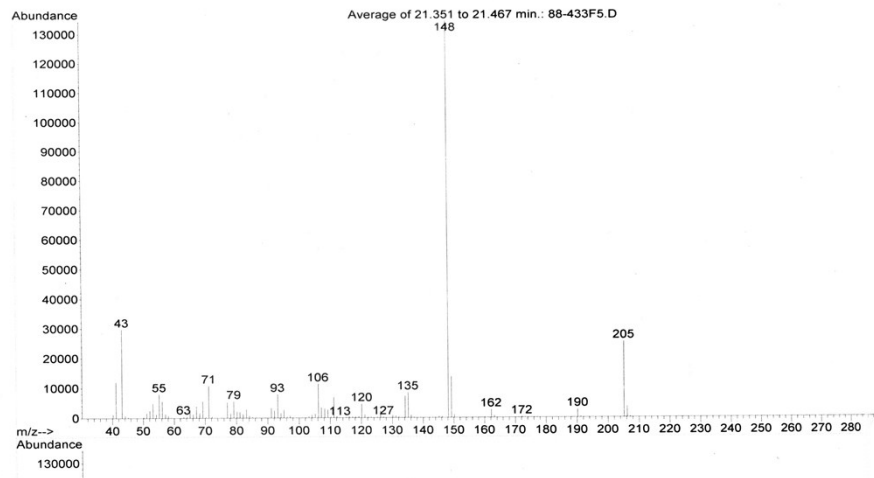

**S Fig. 12** GC-MS spectrum of compound **14**

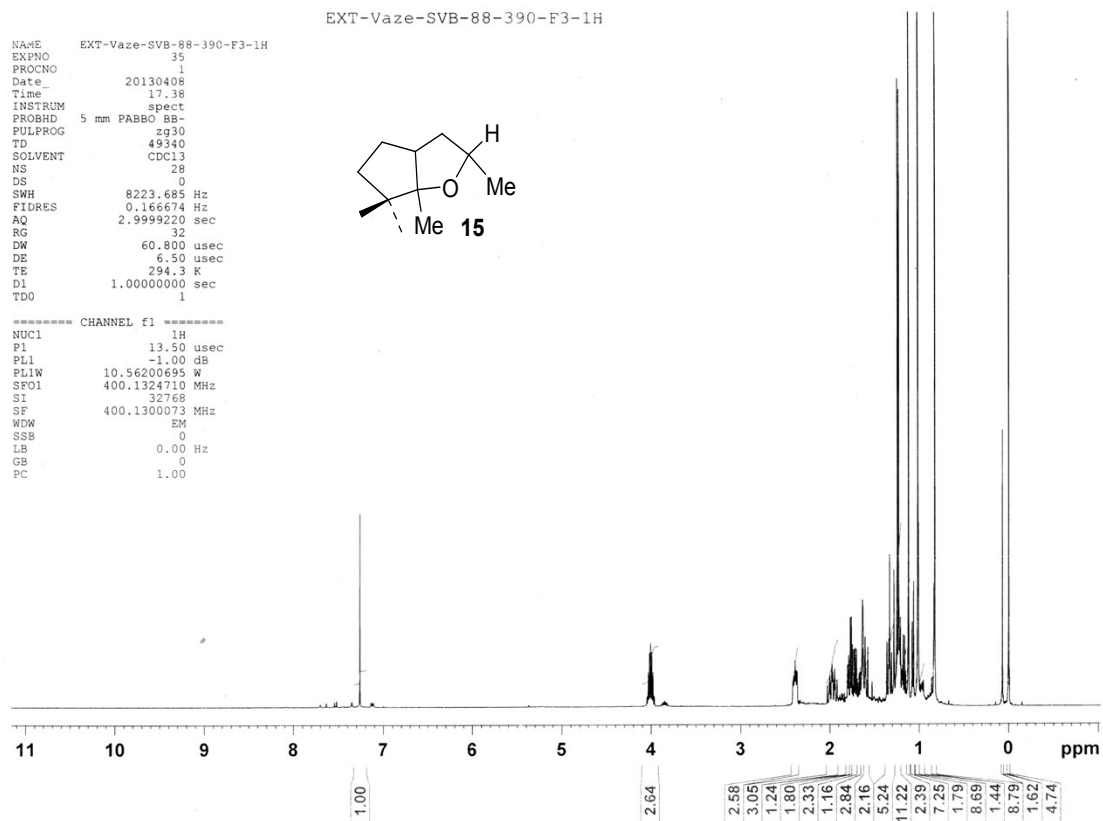

**S Fig. 13** <sup>1</sup>H NMR spectrum (400 MHz) of compound **15**

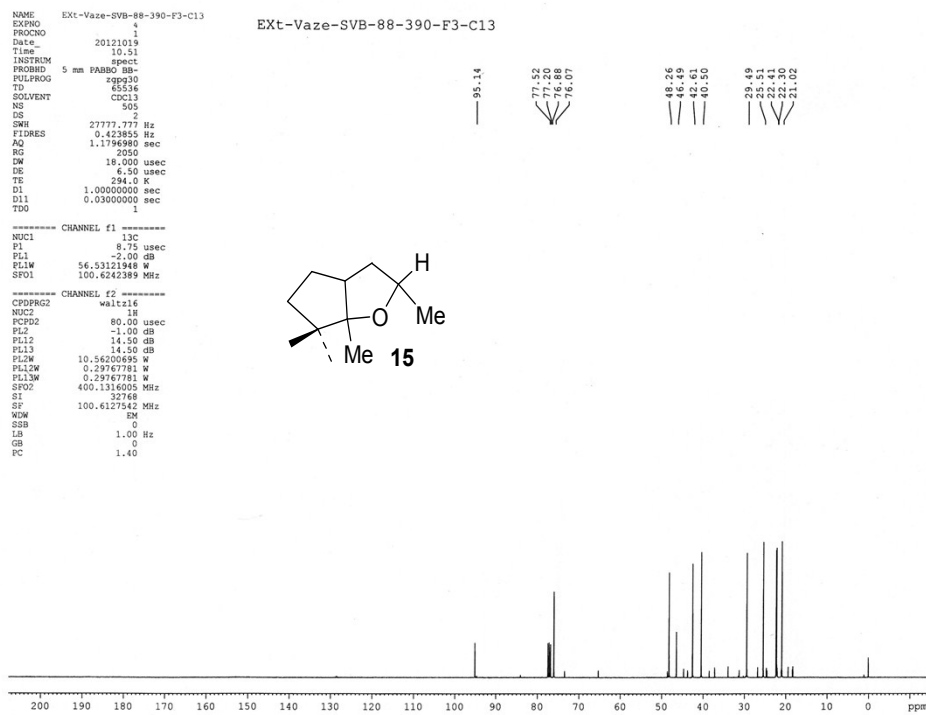

**S Fig. 14**  $^{13}\text{C}$  NMR spectrum (100 MHz) of compound **15**

File : C:\MSDCHEM\1\DATA\DATA2012\R&D2012\88-390F3.D  
Operator :  
Acquired : 12 Oct 2012 12:16 using AcqMethod PERF  
Instrument : MS5973N  
Sample Name: 88-390-F3, PDCT MOL WT-168  
Misc Info : FROM R&D, 11/10/2012  
Vial Number: 36

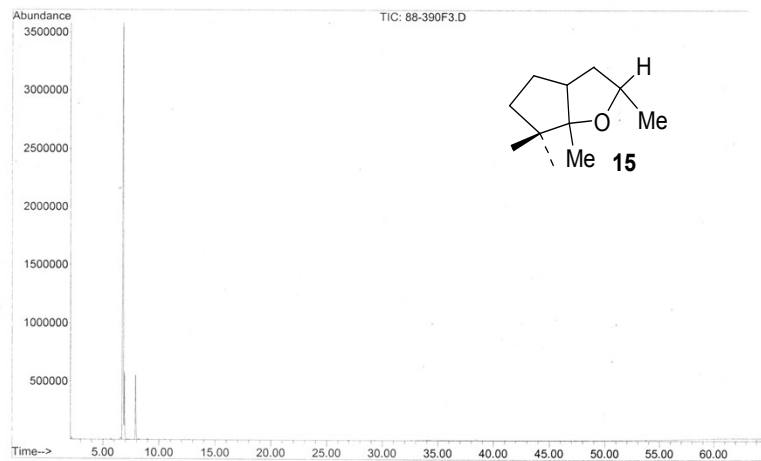

File : C:\MSDCHEM\1\DATA\DATA2012\R&D2012\88-390F3.D  
Operator :  
Acquired : 12 Oct 2012 12:16 using AcqMethod PERF  
Instrument : MS5973N  
Sample Name: 88-390-F3, PDCT MOL WT-168  
Misc Info : FROM R&D, 11/10/2012  
Vial Number: 36

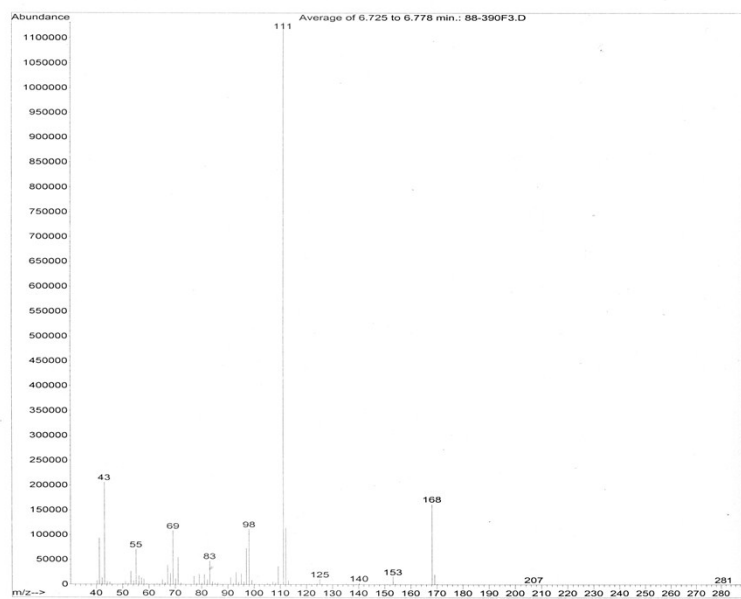

S Fig. 15 GC-MS spectrum of compound 15

NAME EXT-VAZE-SVB-88-347-F4-1-1H  
 EXPNO 23  
 FPRONO 1  
 Date\_ 20120709  
 Time 17:15  
 INSTRUM spect  
 PROBHD 5 mm PABBO BB-  
 PULPROG zg30  
 TD 66900  
 SOLVENT CDCl3  
 NS 127  
 DS 0  
 SWH 8802.817 Hz  
 FIDRES 0.131582 Hz  
 AQ 3.7999699 sec  
 RG 10  
 DW 56.800 usec  
 DE 6.50 usec  
 TE 293.2 K  
 D1 1.0000000 sec  
 TDO 1

EXT-VAZE-SVB-88-347-F4-1-1H

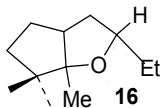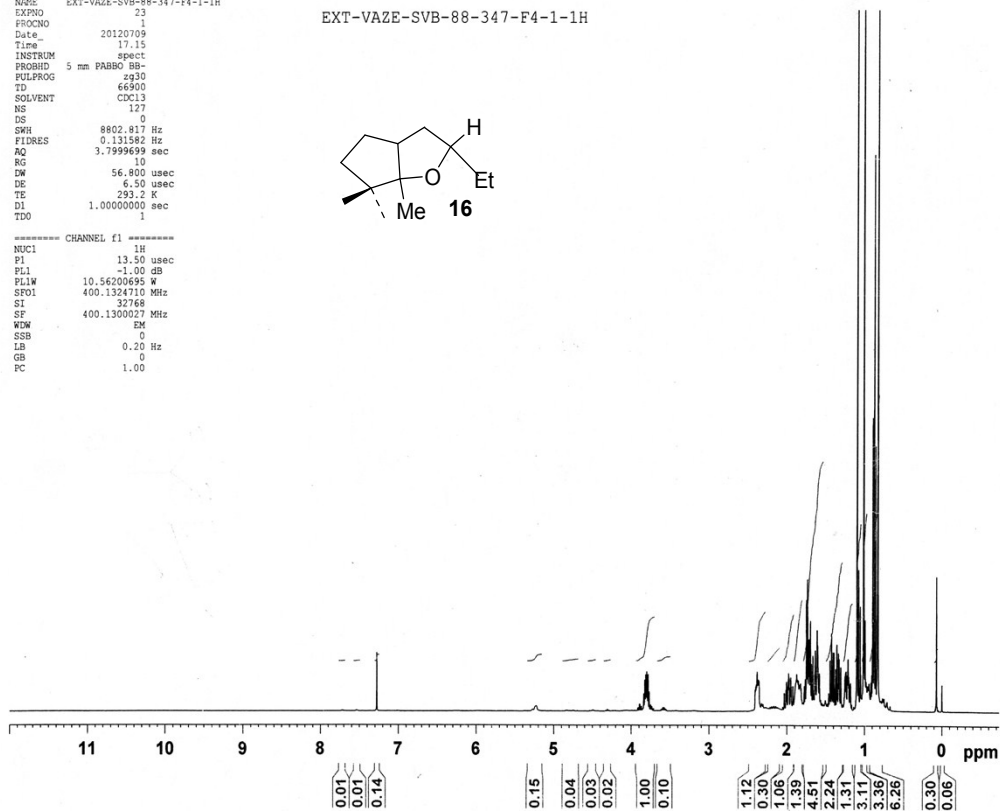

**S Fig. 16** <sup>1</sup>H NMR spectrum (400 MHz) of compound **16**

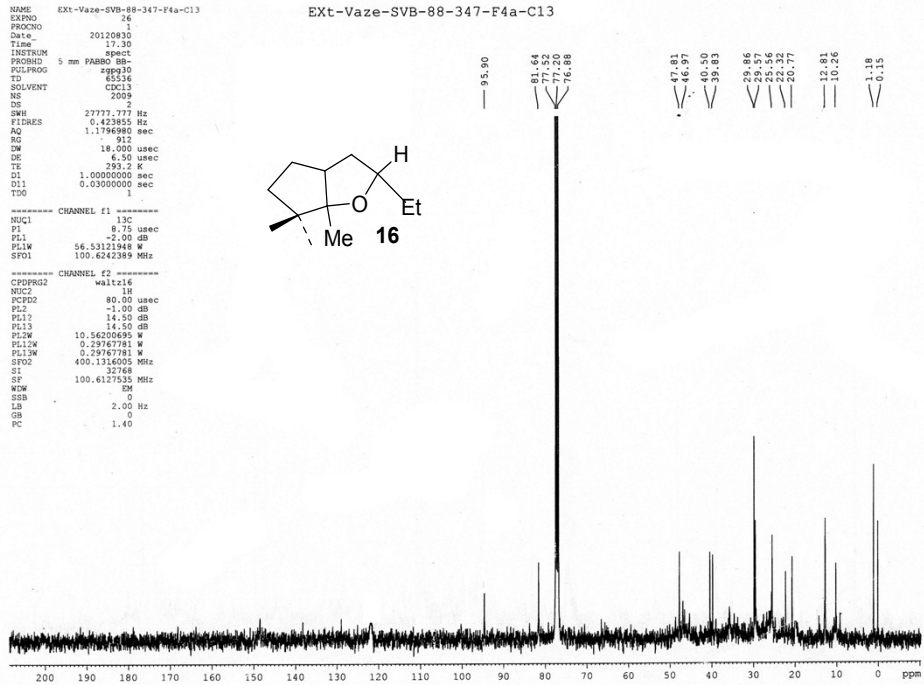

S Fig. 17  $^{13}\text{C}$  NMR spectrum (100 MHz) of compound 16

File : C:\MSDCHEM\1\DATA\DATA2012\R&D2012\88-347F4.D  
Operator :  
Acquired : 27 Jun 2012 2:46 using AcqMethod PERF  
Instrument : MS5973N  
Sample Name: 88-347F4(1), PDCT MOL WT-182  
Misc Info : FROM R&D, 26/06/2012  
Vial Number: 7

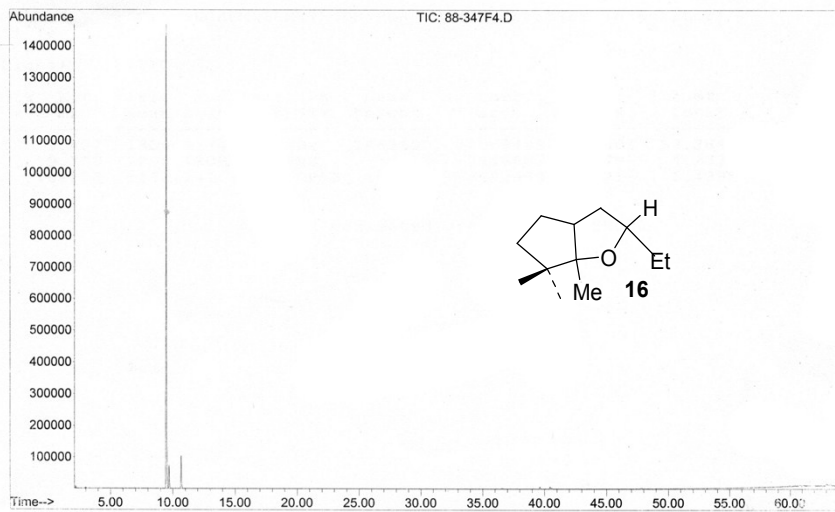

File : C:\MSDCHEM\1\DATA\DATA2012\R&D2012\88-347F4.D  
Operator :  
Acquired : 27 Jun 2012 2:46 using AcqMethod PERF  
Instrument : MS5973N  
Sample Name: 88-347F4(1), PDCT MOL WT-182  
Misc Info : FROM R&D, 26/06/2012  
Vial Number: 7

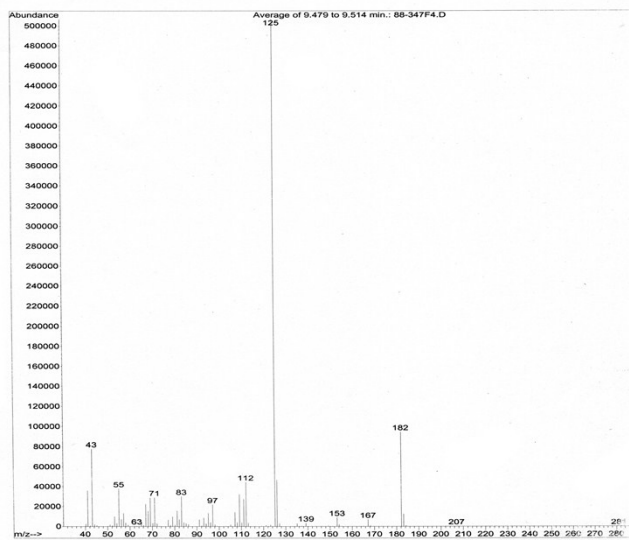

**S Fig. 18** GC-MS spectrum of compound 16

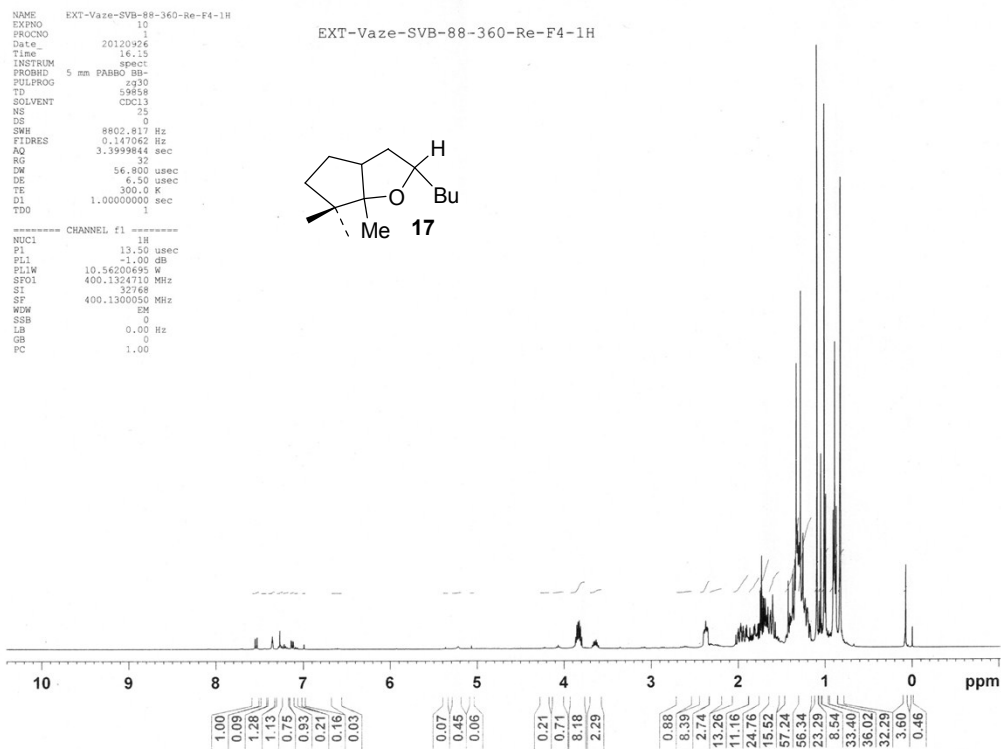

**S Fig 19**  $^1\text{H}$  NMR spectrum (400 MHz) of compound **17**



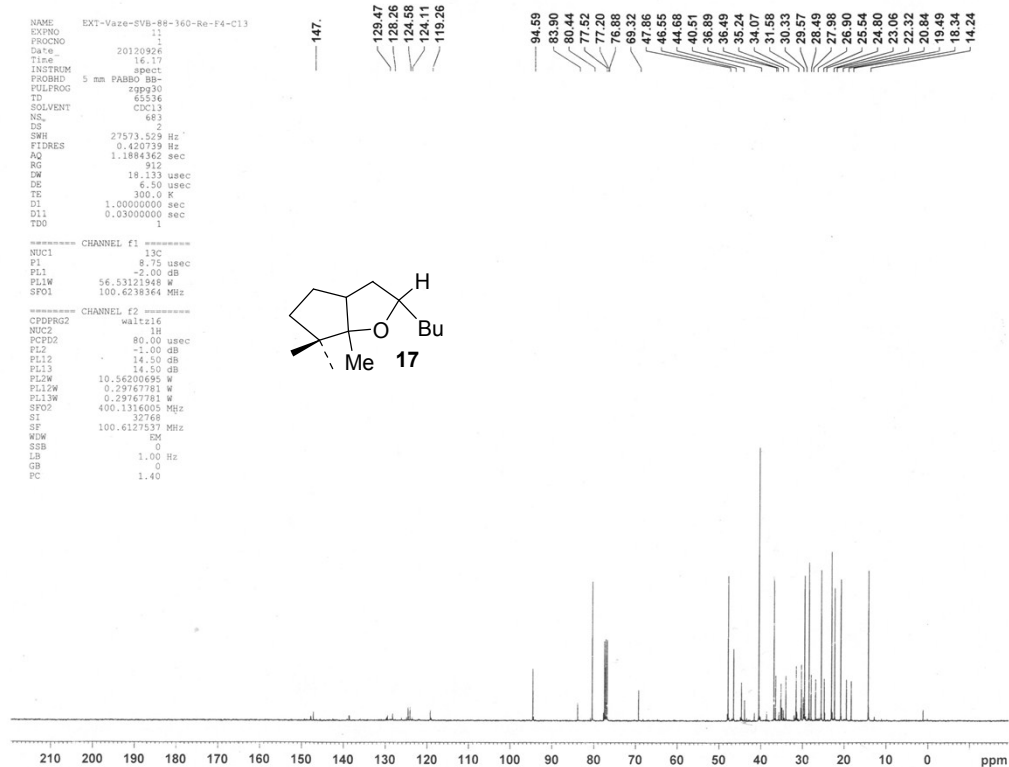

**S Fig. 20**  $^{13}\text{C}$  NMR spectrum (100 MHz) of compound **17**

File : C:\MSDCHEM\1\DATA\88-360F6.D  
Operator :  
Acquired : 8 Aug 2012 16:29 using AcqMethod PERF  
Instrument : MS5973N  
Sample Name : 88-360-F6, PDCT MOL WT-210  
Misc Info : FROM R&D, 8/8/2012  
Vial Number : 35

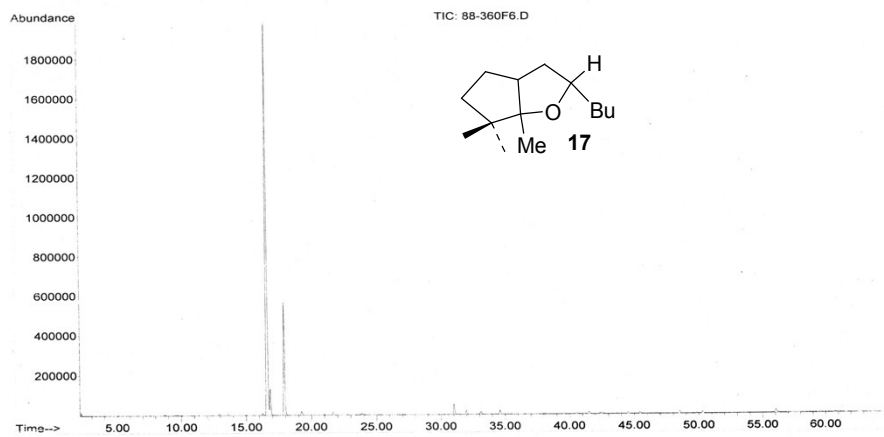

File : C:\MSDCHEM\1\DATA\88-360F6.D  
Operator :  
Acquired : 8 Aug 2012 16:29 using AcqMethod PERF  
Instrument : MS5973N  
Sample Name : 88-360-F6, PDCT MOL WT-210  
Misc Info : FROM R&D, 8/8/2012  
Vial Number : 35

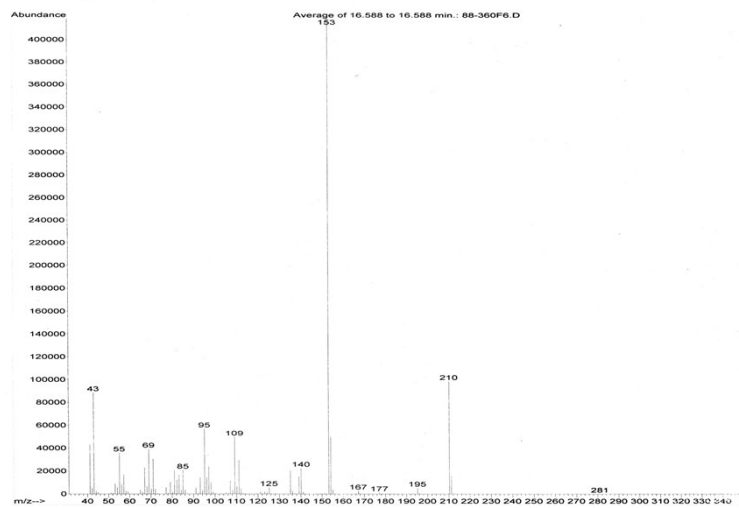

S Fig. 21 GC-MS spectrum of compound 17

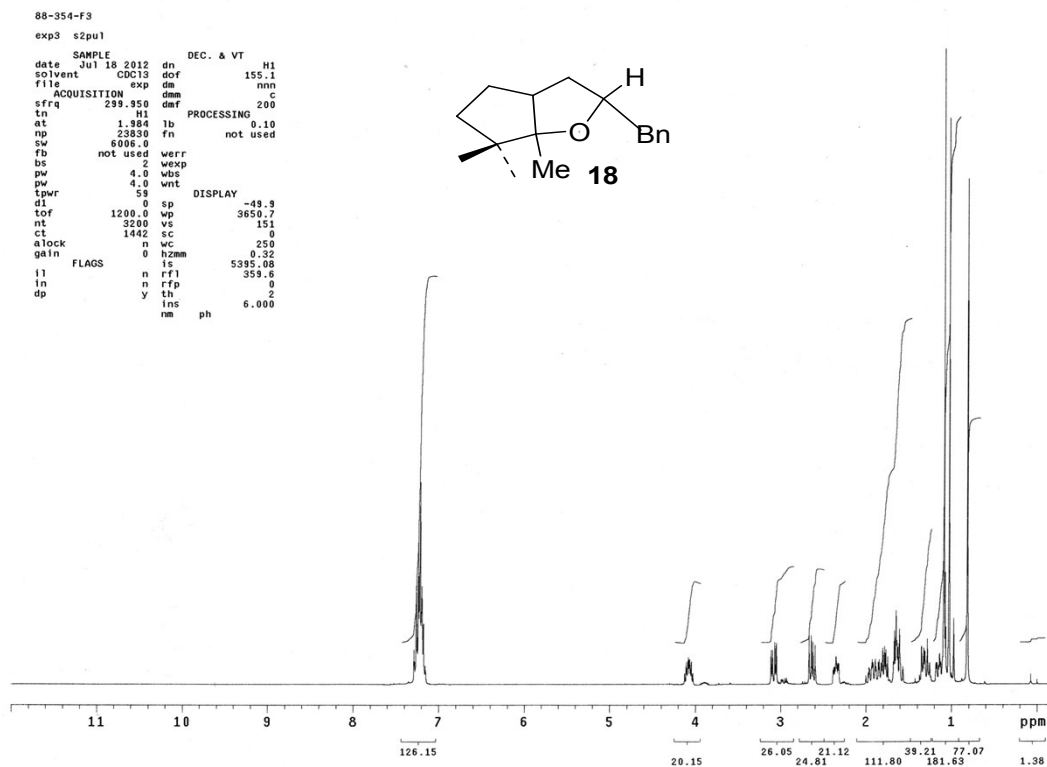

S Fig. 22  $^1\text{H}$  NMR spectrum (300 MHz) of compound 18

Ext-Vaze-SVB-88-354-F3-C13

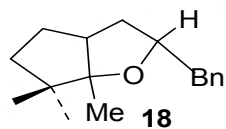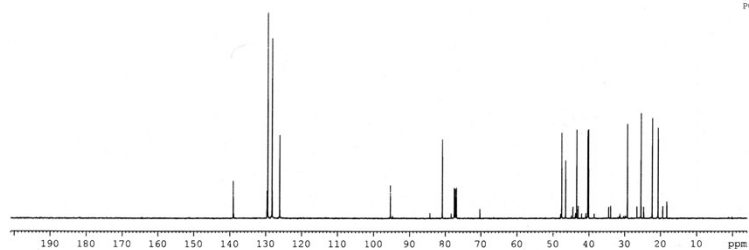

```
NAME Ext-Vaze-SVB-88-354-F3-C13
EXPNO 24
PROCNO 1
Date_ 20120830
Time 17:10
INSTRUM spect
PROBHD 5 mm PABBO BB-
PULPROG zgpg30
TD 65536
SOLVENT CDCl3
NS 128
DS 2
SWH 27777.777 Hz
FIDRES 0.423855 Hz
AQ 1.1796980 sec
RG 912
DM 18.000 usec
DE 6.50 usec
TE 293.0 K
D1 1.0000000 sec
D11 0.0300000 sec
TDO 1

===== CHANNEL f1 =====
NUC1 13C
P1 8.75 usec
PL1 -2.00 dB
PL1W 56.53121948 W
SFO1 100.624389 MHz

===== CHANNEL f2 =====
CHOPRG2 waltz16
NUC2 1H
PCPD2 80.00 usec
PL2 -1.00 dB
PL12 14.50 dB
PL13 14.50 dB
PL2W 10.56200495 W
PL12W 0.28767781 W
PL13W 0.28767781 W
SFO2 400.1314005 MHz
SI 32768
SF 100.6127652 MHz
MDW 0
SSB 0
LB 1.00 Hz
GB 0
PC 1.40
```

S Fig. 23  $^{13}\text{C}$  NMR spectrum (75 MHz) of compound 18

File : C:\MSDCHEM\1\DATA\DATA2012\R&D2012\88354F3.D  
Operator :  
Acquired : 9 Jul 2012 17:54 using AcqMethod PERF  
Instrument : MS5973N  
Sample Name : 88-354F3 F12, PDCT MOL WT-244  
Misc Info : FROM R&D, 9/07/2012  
Vial Number : 4

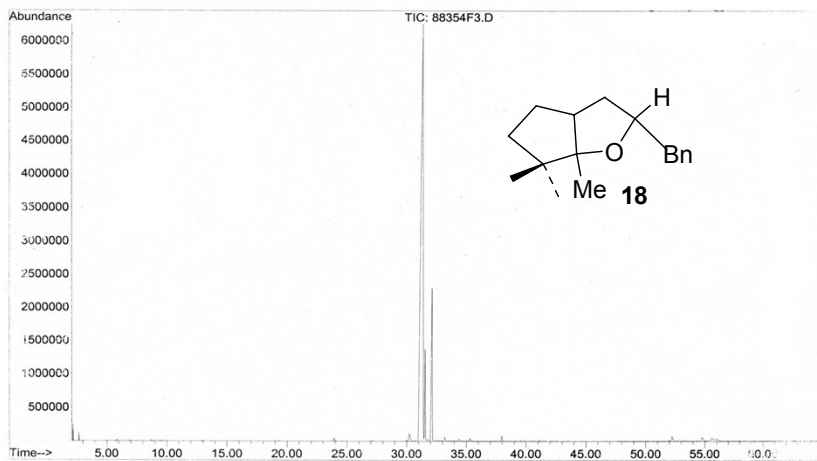

File : C:\MSDCHEM\1\DATA\DATA2012\R&D2012\88354F3.D  
Operator :  
Acquired : 9 Jul 2012 17:54 using AcqMethod PERF  
Instrument : MS5973N  
Sample Name : 88-354F3 F12, PDCT MOL WT-244  
Misc Info : FROM R&D, 9/07/2012  
Vial Number : 4

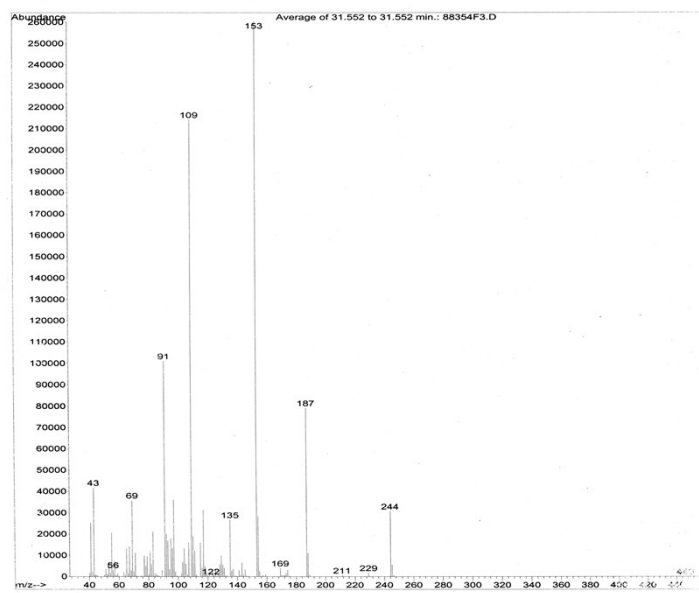

**S Fig. 24** GC-MS spectrum of compound 18

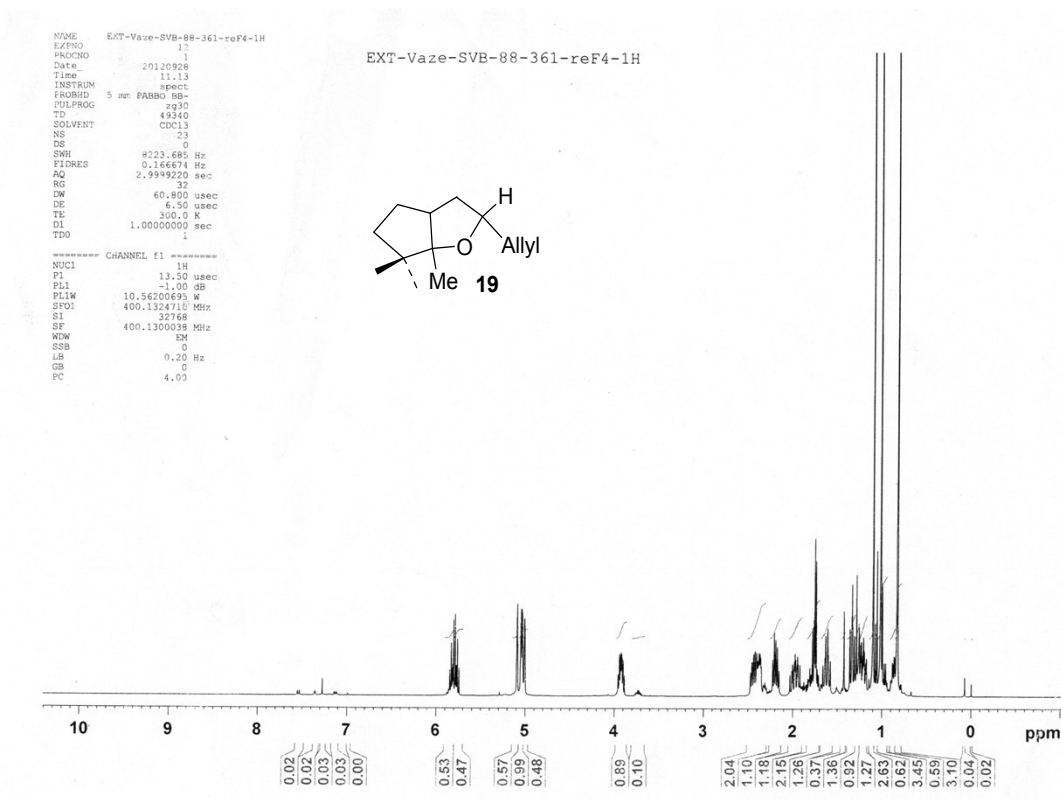

S Fig. 25 <sup>1</sup>H NMR spectrum (400 MHz) of compound 19

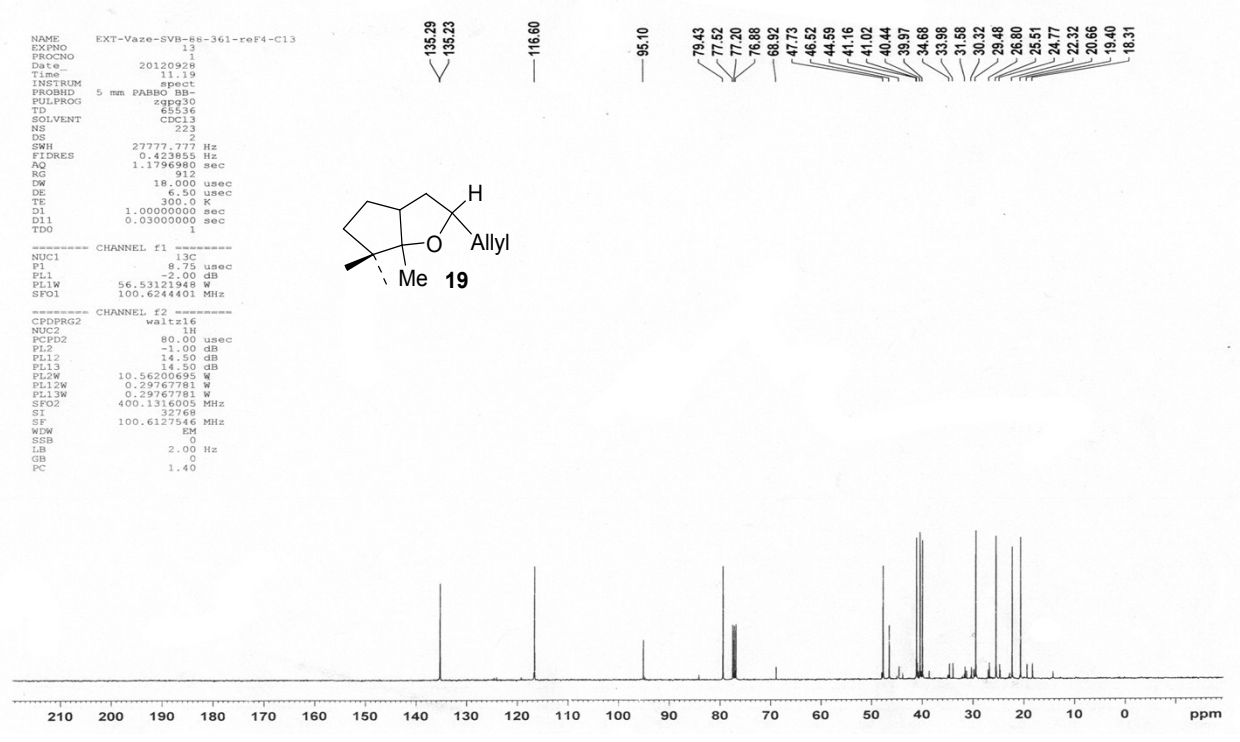

**S Fig. 26** <sup>13</sup>C NMR spectrum (100 MHz) of compound **19**

File : C:\MSDCHEM\1\DATA\88-361F2.D  
 Operator :  
 Acquired : 8 Aug 2012 17:50 using AcqMethod PERF  
 Instrument : MS5973N  
 Sample Name : 88-361-F2, PDCT MOL WT-194  
 Misc Info : FROM R&D, 8/8/2012  
 Vial Number : 36

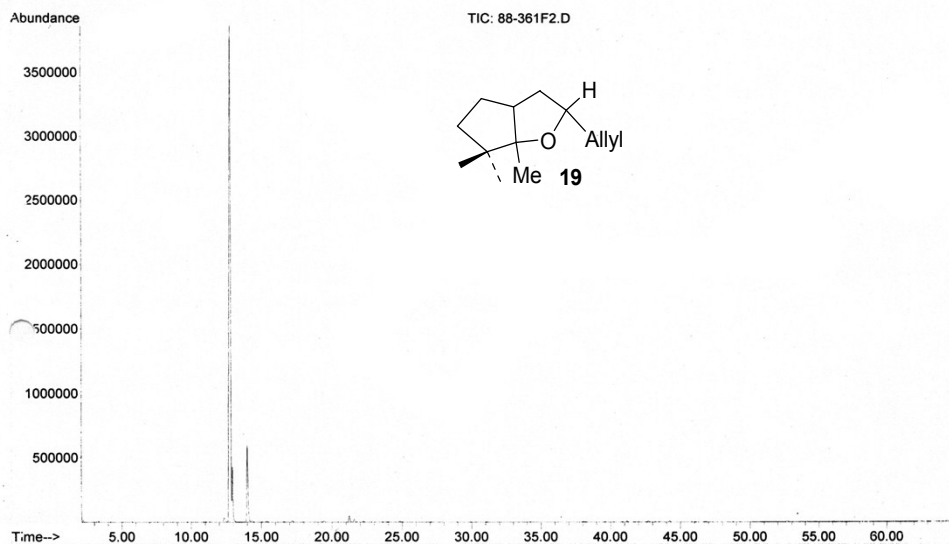

File : C:\MSDCHEM\1\DATA\88-361F2.D  
 Operator :  
 Acquired : 8 Aug 2012 17:50 using AcqMethod PERF  
 Instrument : MS5973N  
 Sample Name : 88-361-F2, PDCT MOL WT-194  
 Misc Info : FROM R&D, 8/8/2012  
 Vial Number : 36

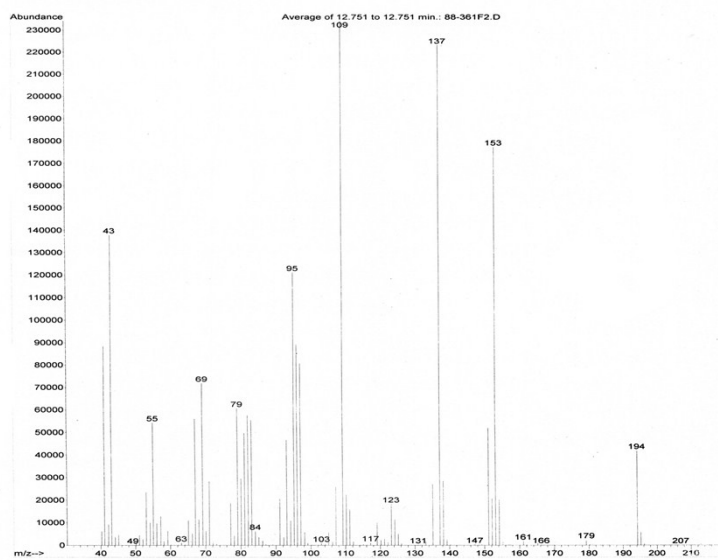

**S Fig. 27** GC-MS spectrum of compound 19



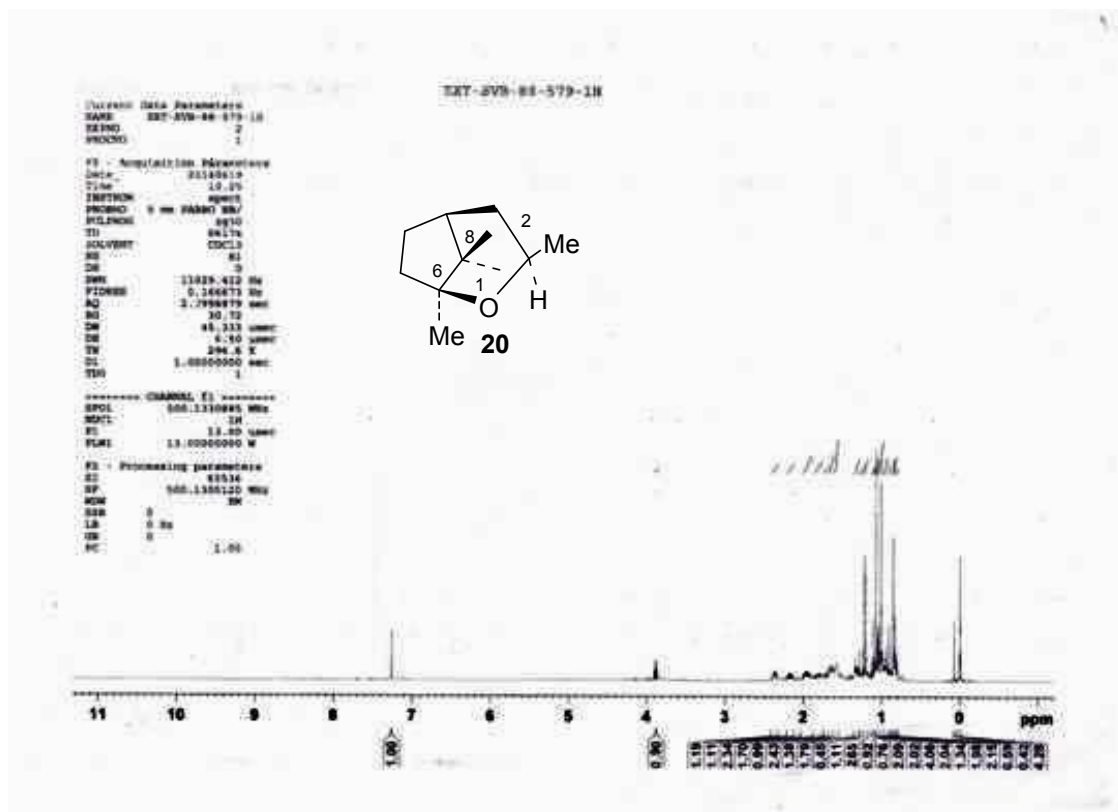

S Fig. 28 <sup>1</sup>H NMR spectrum (400 MHz) of compound 20

```

00-520-F8
-----
  expt 12901          SPECIAL
  date  SAMPLE          not used
  collect C0013      Low  0.000
  file  rawport/home/  11.500
  name  20.000
  ACQUISITION
  sv  23280.0  11  FLAG  n
  st  3.000  10  n
  rg  17000  00  v
  rd  12000  00  m
  bs  4  PROCESSING
  ds  3.000  10  4.00
  rt  350  00  not used
  cc  350  DISPLAY
  TRANSMITTER
  tx  C13  up  -366.1
  pfr  75.430  rfr  3521.0
  sol  1.00  1  1010.0
  lpr  4.00  10  -170.0
  pr  4.750  10  -337.0
  DECOUPLER
  ds  M1  M1  PLDT  256
  dsf  0  SC  0
  ds  Y3Y  V4  50
  ds  W  Lk  4
  spwr  33  mw
  dsf  11390  mw  0h

```

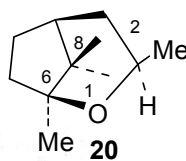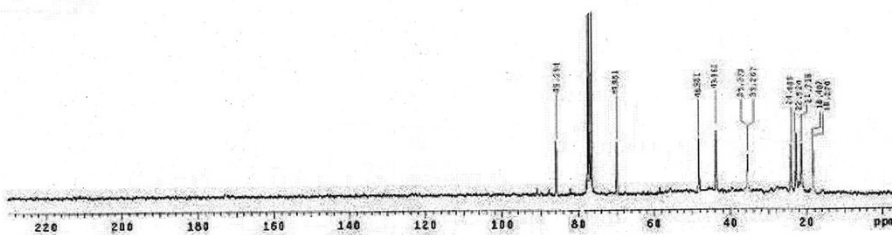

S Fig. 29 <sup>13</sup>C NMR spectrum (100 MHz) of compound 20

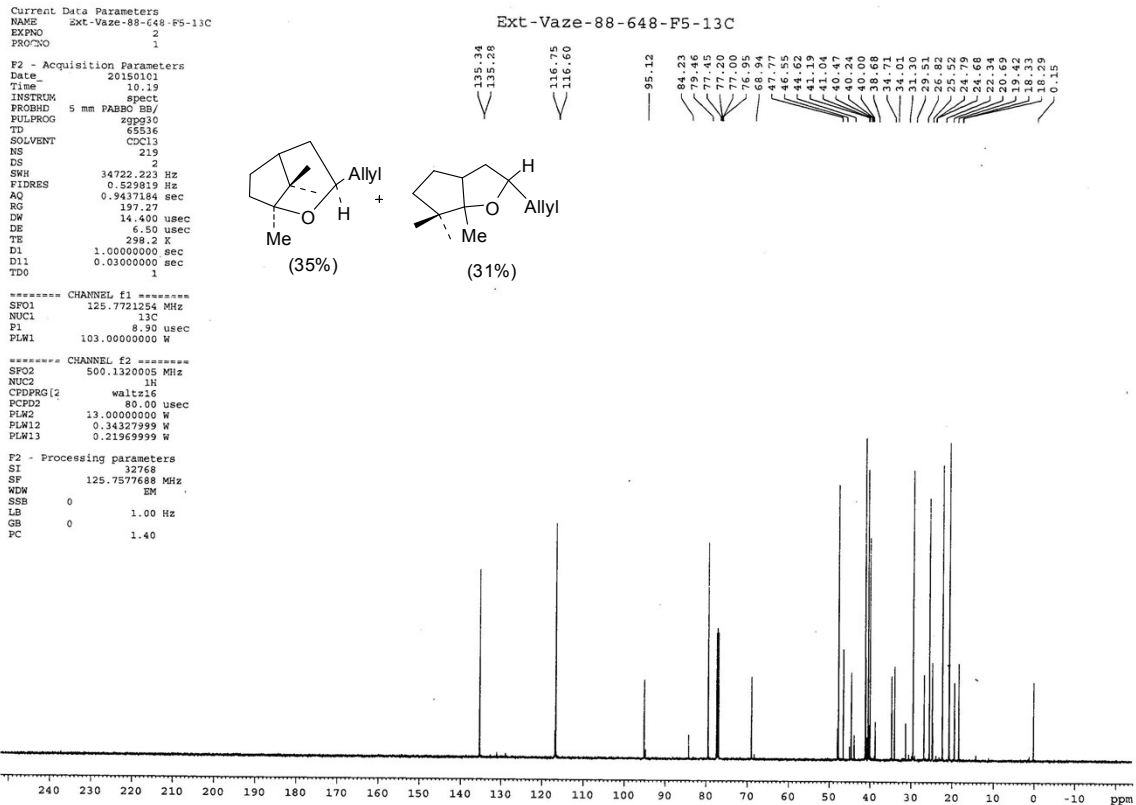

**S Fig. 30**  $^{13}\text{C}$  NMR spectrum (125 MHz) of mixture of 2-Allyl-6,6,6a-trimethyl-hexahydrocyclopenta(b)furan **19** and 2-Allyl-6,8,8-trimethyl-1-oxabicyclo[3.2.1]octane, (3:1 mixture)
